# Supplementary material for: DegS regulates the aerobic metabolism of Vibrio cholerae via the ArcA-isocitrate dehydrogenase pathway for growth and intestinal colonization
Source: Front Cell Infect Microbiol. 2024 Nov 1;14:1482919. doi: 10.3389/fcimb.2024.1482919 (PMC11564185; doi:10.3389/fcimb.2024.1482919)
Supplement: Supplementary file 2 [file Table2.xlsx]

## Sheet: Metabolites List
			Supplementary Table 3. Screening for differentially expressed metabolites of between the ΔdegS and the WT
Alignment ID	Average Rt(min)	Metabolite name	Adduct type	Reference m/z	Formula	Ontology	INCHIKEY	SMILES	Total score	MS1 isotopic spectrum	MS/MS spectrum	ΔdegS-1	ΔdegS-2	ΔdegS-3	ΔdegS-4	ΔdegS-5	ΔdegS-6	WT-1	WT-2	WT-3	WT-4	WT-5	WT-6
30	9.148	1-Hexylamine	[M+H]+	102.128	C6H15N	Monoalkylamines	BMVXCPBXGZKUPN-UHFFFAOYSA-N	CCCCCCN	85.9	102.12957:13254 103.13292:1125 104.13628:56	102.13725:126	12929	11538	21079	27107	30931	19331	17519	33778	24699	52102	23635	21183
47	1.185	N,N-Dimethylglycine	[M+H]+	104.071	C4H9NO2	Alpha amino acids	FFDGPVCHZBVARC-UHFFFAOYSA-N	CN(C)CC(O)=O	84.3	104.07433:29074 105.07768:1188 106.08104:0	58.06245:126	110789	99560	98745	83721	131748	99339	93267	94852	108730	98652	96974	97366
148	1.23	Glycine-Betaine	[M+H]+	118.086	C5H11NO2	Alpha amino acids	KWIUHFFTVRNATP-UHFFFAOYSA-N	C[N+](C)(C)CC([O-])=O	95.8	118.08696:289780 119.09031:22106 120.09367:3525	58.06171:952 58.08967:297 59.06905:734 118.0813:1842	2134821	1932880	1161817	477343	922063	804612	2000816	1947694	3701396	3757108	2665512	4015880
231	1.564	Isonicotinic acid	[M+H]+	124.039	C6H5NO2	Pyridinecarboxylic acids	TWBYWOBDOCUKOW-UHFFFAOYSA-N	OC(=O)C1=CC=NC=C1	89.7	124.03754:10590 125.04089:964 126.04425:717	96.04781:126 124.02551:256 124.02866:252 124.03023:252 124.03651:129 124.03809:126 124.03966:129 124.04594:126	27591	83776	80552	81691	26960	31252	75016	54346	104315	75175	146337	55403
233	1.515	Nicotinic acid	[M+H]+	124.039	C6H5NO2	Pyridinecarboxylic acids	PVNIIMVLHYAWGP-UHFFFAOYSA-N	O=C(O)C=1C=NC=CC1	85.4	124.03834:15877 125.04169:1223 126.04505:720	53.07834:257 78.02991:261 79.05267:261 80.04549:386 106.01185:256 106.02347:258 124.03258:654	245374	107136	173840	51806	222479	89477	68752	115116	15097	64165	162614	107400
268	1.287	DL-Coniine	[M+H]+	128.143	C8H17N	Alkaloids and derivatives	NDNUANOUGZGEPO-UHFFFAOYNA-N	CCCC1CCCCN1	93.3	128.1431:13962 129.14645:3220 130.14981:0	83.08176:126 128.1277:126 128.13408:126 128.13887:126 128.14687:126	63986	113483	89900	54294	104772	69786	38288	44551	51864	70874	43399	44897
296	1.309	L-5-Oxoproline	[M+H]+	130.05	C5H7NO3	Alpha amino acids and derivatives	ODHCTXKNWHHXJC-VKHMYHEASA-N	OC(=O)[C@@H]1CCC(O)=N1	83.9	130.04803:6625 131.05138:668 132.05474:594	84.03769:126 84.04157:126 84.04416:126 84.85057:126 89.05621:126 130.07582:126	78698	48308	66333	32291	69371	51124	19798	16929	9179	19532	29243	35065
314	2.102	Leucine	[M+H]+	132.102	C6H13NO2	Leucine and derivatives	ROHFNLRQFUQHCH-UHFFFAOYNA-N	CC(C)CC(N)C(O)=O	84.3	132.10059:22513 133.10394:2709 134.1073:339	82.01382:25 86.09181:311	108692	20091	33997	219284	31578	50651	32609	30653	50147	206112	42787	53252
317	2.045	DL-Norleucine	[M+H]+	132.102	C6H13NO2	L-alpha-amino acids	LRQKBLKVPFOOQJ-UHFFFAOYSA-N	CCCCC(C(=O)O)N	88.1	132.10226:11250 133.10561:1321 134.10897:322	69.06932:84 86.05247:86 86.09436:173 87.05791:43	181616	164693	127669	27829	123311	136721	62471	127052	122558	206380	180290	254774
355	1.763	Adenine	[M+H]+	136.062	C5H5N5	6-aminopurines	GFFGJBXGBJISGV-UHFFFAOYSA-N	NC1=C2N=CN=C2NC=N1	83.1	136.06348:3528 137.06683:1497 138.07019:321	136.04904:252	8935	24113	10884	28436	18037	36223	29762	30300	18680	32160	32991	14203
465	1.285	L-Glutamic acid	[M+H]+	148.06	C5H9NO4	Glutamic acid and derivatives	WHUUTDBJXJRKMK-VKHMYHEASA-N	C(CC(=O)O)[C@@H](C(=O)O)N	90.7	148.0602:11283 149.06355:1790 150.06691:0	84.04617:126 130.04114:126 148.04521:126	261916	68853	193729	6724	250341	41534	19059	36614	75593	71247	66773	26081
467	1.238	Glutamic acid	[M+H]+	148.06	C5H9NO4	Glutamic acid and derivatives	WHUUTDBJXJRKMK-UHFFFAOYNA-N	NC(CCC(O)=O)C(O)=O	81.6	148.06189:32021 149.06524:1652 150.0686:236	56.05492:259 84.03537:654 130.03436:126	280403	67920	117088	1306	79010	9099	11719	27853	39810	5790	17070	23024
483	10.477	Phthalic anhydride	[M+H]+	149.023	C8H4O3	Phthalic anhydrides	LGRFSURHDFAFJT-UHFFFAOYSA-N	O=C1OC(=O)C2=CC=CC=C12	83.8	149.02188:57269 150.02523:5278 151.02859:833	93.02805:126 121.02483:261 149.01526:1072	245607	306146	284376	237221	294431	211536	213862	185910	186871	216798	210404	191236
490	1.279	Citramalate	[M+H]+	149.044	C5H8O5	Hydroxy fatty acids	XFTRTWQBIOMVPK-YFKPBYRVSA-N	C[C@](O)(CC(O)=O)C(O)=O	86.6	149.02348:7934 150.02683:550 151.03019:1099	133.00211:126 149.01517:252	15540	23723	30624	2782	13447	25716	22547	13393	20146	26875	23625	12737
493	5.013	trans-Cinnamate	[M+H]+	149.06	C9H8O2	Cinnamic acids	WBYWAXJHAXSJNI-VOTSOKGWSA-N	OC(=O)\C=C\C1=CC=CC=C1	82.5	149.0435:6027 150.04685:1405 151.05021:1718	131.04811:126 149.01965:387	16243	28612	22803	9701	22856	7923	15335	18297	18974	9437	10651	15556
494	8.68	p-Coumaraldehyde	[M+H]+	149.06	C9H8O2	Cinnamaldehydes	CJXMVKYNVIGQBS-OWOJBTEDSA-N	OC1=CC=C(\C=C\C=O)C=C1	85.4	149.0589:6685 150.06225:2218 151.06561:1331	149.01619:126	24852	24089	32571	20999	23311	18370	27833	28301	27906	28657	25955	24087
522	1.93	Paracetamol	[M+H]+	152.071	C8H9NO2	1-hydroxy-2-unsubstituted benzenoids	RZVAJINKPMORJF-UHFFFAOYSA-N	CC(O)=NC1=CC=C(O)C=C1	87.9	152.05591:40977 153.05926:4709 154.06262:960	110.03354:126 152.05093:252	453157	196599	195801	249094	206887	387922	323655	247873	401032	246445	383658	562531
584	3.425	Homostachydrine	[M+H]+	158.118	C8H15NO2	Alpha amino acids	XULZWQRXYTVUTE-ZETCQYMHSA-N	C[N+]1(C)CCCC[C@H]1C(=O)[O-]	83	158.0966:4483 159.09995:906 160.10331:125	158.07727:505	6385	24578	10016	2883	39482	3971	2272	2395	3257	2902	3070	2584
607	12.289	6-Methylcoumarin	[M+H]+	161.06	C10H8O2	Coumarins and derivatives	FXFYOPQLGGEACP-UHFFFAOYSA-N	CC1=CC2=C(OC(=O)C=C2)C=C1	80.4	161.05865:1853 162.062:454 163.06536:1587	161.09819:126	4030	4650	3130	5955	3826	2005	9356	5545	2278	4852	2002	3848
647	1.869	3-Hydroxycinnamic acid	[M+H]+	165.055	C9H8O3	Hydroxycinnamic acids	KKSDGJDHHZEWEP-SNAWJCMRSA-N	OC(=O)\C=C\C1=CC(O)=CC=C1	84.2	165.05493:2770 166.05828:110 167.06164:439	91.06593:126	22226	6596	11589	16401	12128	19290	14691	20428	9424	8446	19889	24961
660	1.753	L-(-)-Phenylalanine	[M+H]+	166.086	C9H11NO2	Phenylalanine and derivatives	COLNVLDHVKWLRT-QMMMGPOBSA-N	N[C@@H](CC1=CC=CC=C1)C(O)=O	85.7	166.05199:9762 167.05534:774 168.0587:774	120.0375:126 166.05754:129	28008	19409	22241	34711	20843	32402	42593	28759	30497	32348	38265	40930
688	3.951	Norharman	[M+H]+	169.076	C11H8N2	Beta carbolines	AIFRHYZBTHREPW-UHFFFAOYSA-N	N=1C=CC2=C(C1)NC=3C=CC=CC32	81	169.07368:1604 170.07703:444 171.08039:1340	71.23999:63 127.00262:63 169.05908:128 169.07559:254	4136	12235	5280	5461	8185	4625	4253	2961	2640	3739	3340	5363
748	1.738	Atrazine-desisopropyl	[M+H]+	174.054	C5H8ClN5	1,3,5-triazine-2,4-diamines	IVENSCMCQBJAKW-UHFFFAOYSA-N	CCN=C1NC(Cl)=NC(=N)N1	83.7	174.03471:4208 175.03806:1531 176.04142:851	174.07739:125	16692	6431	10263	7991	8794	8005	14923	6845	14339	12778	19483	9805
810	3.985	N-BENZOYL(D5) GLYCINE	[M+H]+	180.066	C9H9NO3	Hippuric acids	QIAFMBKCNZACKA-UHFFFAOYSA-N	OC(=O)CN=C(O)C1=CC=CC=C1	83.7	180.0656:2745 181.06895:754 182.07231:218	105.02985:385	10648	8762	11132	15222	10588	7280	12500	1962	7738	11507	1455	890
811	15.288	D-(+)-Glucosamine	[M+H]+	180.087	C6H13NO5	Hexoses	MSWZFWKMSRAUBD-QZABAPFNSA-N	N[C@H]1[C@H](O)O[C@H](CO)[C@@H](O)[C@@H]1O	85.4	180.0818:3445 181.08515:154 182.08851:231	180.061:125	12273	14409	10471	13315	12875	14306	14488	11576	14308	14022	15090	13291
854	5.401	4-HYDROXY-3-METHOXYPHENYLACETIC ACID (2,5,6-D3,ALPHA,ALPHA-D2)	[M+H]+	183.065	C9H10O4	Methoxyphenols	QRMZSPFSDQBLIX-UHFFFAOYSA-N	COC1=C(O)C=CC(CC(O)=O)=C1	85	183.07719:4055 184.08054:1175 185.0839:552	142.02879:254	11890	24875	16618	15218	23264	19850	13859	16599	20730	14164	14828	16507
912	2.935	Deoxyvasicinone	[M+H]+	187.087	C11H10N2O	Quinazolines	VARHXCYGZKSOOO-UHFFFAOYSA-N	O=C1N2CCCC2=NC2=CC=CC=C12	85.6	187.09512:2115 188.09847:384 189.10183:648	187.08331:125	17082	23943	43658	44840	24578	2109	12251	19110	22031	16812	16002	15381
1014	6.528	Dimethyl phthalate	[M+H]+	195.065	C10H10O4	Benzoic acid esters	NIQCNGHVCWTJSM-UHFFFAOYSA-N	O=C(OC)C=1C=CC=CC1C(=O)OC	83.7	195.06299:2243 196.06634:186 197.0697:466	79.05383:252 133.03793:398 135.0421:264 163.02493:549	10665	18281	13661	11061	13357	11809	11183	11227	12473	12762	9118	6973
1492	15.089	Ritalinic acid	[M+H]+	220.133	C13H17NO2	Aralkylamines	INGSNVSERUZOAK-UHFFFAOYNA-N	OC(=O)C(C1CCCCN1)C1=CC=CC=C1	82.7	220.1116:3413 221.11495:1349 222.11831:395	220.11951:256	7080	6718	6537	6699	7549	6919	7646	8422	6587	8107	6335	8492
1720	3.246	1-(3-(Trifluoromethyl)phenyl)piperazine	[M+H]+	231.11	C11H13F3N2	Phenylpiperazines	KKIMDKMETPPURN-UHFFFAOYSA-N	FC(F)(F)C1=CC(=CC=C1)N1CCNCC1	85.5	231.11958:3922 232.12293:761 233.12629:429	231.10612:252	4486	34519	47976	42202	16945	4245	2558	12935	20788	35567	8636	8708
1777	1.302	Lenacil	[M+H]+	235.144	C13H18N2O2	Hydroxypyrimidines	ZTMKADLOSYKWCA-UHFFFAOYSA-N	OC1=NC2=C(CCC2)C(=O)N1C1CCCCC1	81.6	235.16119:3819 236.16454:843 237.1679:481	235.15176:252	15924	19103	34264	1195	10844	2534	56130	50213	69677	63476	84540	35334
1854	4.865	Primuletin	[M+H]+	239.07	C15H10O3	Flavones	IYBLVRRCNVHZQJ-UHFFFAOYSA-N	O=C1C=C(OC=2C=CC=C(O)C12)C=3C=CC=CC3	83.3	239.08609:35739 240.08944:6341 241.0928:1701	239.08093:382	140657	169864	219384	287084	276139	237697	203648	212600	250930	257358	138264	215605
2179	8.089	2'-Deoxyadenosine	[M+H]+	252.109	C10H13N5O3	Purine 2'-deoxyribonucleosides	OLXZPDWKRNYJJZ-RRKCRQDMSA-N	NC1=C2N=CN([C@H]3C[C@H](O)[C@@H](CO)O3)C2=NC=N1	83.5	252.12064:2773 253.12399:637 254.12735:167	252.10861:252	1756	18752	10182	3141	8768	2309	1691	1556	1646	1889	2385	1856
2237	5.734	Apigeninidin	[M+H]+	255.065	C15H10O4	7-hydroxyflavonoids	ZKMZBAABQFUXFE-UHFFFAOYSA-N	OC1=CC=C(C=C1)C1=[O+]C2=CC(O)=CC([O-])=C2C=C1	80.2	255.06439:1794 256.06774:435 257.0711:336	237.22809:63 255.07028:189	1044	817	1205	6892	774	1918	1129	650	776	1472	1675	1203
2380	3.139	FARNESOL	[M+K]+	261.161	C15H26O	Sesquiterpenoids	CRDAMVZIKSXKFV-YFVJMOTDSA-N	OCC=C(C)CCC=C(C)CCC=C(C)C	80.5	261.13202:2223 262.13537:198 263.13873:445	261.12424:189	6095	10918	9286	9252	9340	10143	6785	6080	6228	9120	4967	6857
2386	11.047	falcarindiol	[M+H]+	261.185	C17H24O2	Long-chain fatty alcohols	QWCNQXNAFCBLLV-RCQSYPNMSA-N	OC(C#CC#CC(O)C=CCCCCCCC)C=C	85.8	261.1842:3133 262.18755:1010 263.19091:504	261.17194:382	3423	10568	6367	4152	6847	3973	1445	1402	1459	2165	1716	2271
2387	8.101	(2S,6R,8aS)-6-(2-hydroxypropan-2-yl)-8a-methyl-4-methylidene-1,2,3,4a,5,6,7,8-octahydronaphthalen-2-ol	[M+Na]+	261.183	C15H26O2	Eudesmane, isoeudesmane or cycloeudesmane sesquiterpenoids	XZXBGGYJQALVAW-VSUHMYSYSA-N	OC1CC(=C)C2CC(CCC2(C)C1)C(O)(C)C	82.8	261.18259:8960 262.18594:2613 263.1893:574	59.28822:126 261.17947:252	27139	21401	16764	13478	14779	16455	8631	9177	5657	6064	7009	6409
2423	7.728	Indigo Carmine	[M+H]+	263.082	C16H10N2O2	Indolines	COHYTHOBJLSHDF-BUHFOSPRSA-N	O=C1C=2C=CC=CC2NC1=C3NC=4C=CC=CC4C3=O	84.4	263.08136:98917 264.08471:24662 265.08807:2636	104.04007:126 190.04582:130 207.07736:256 208.07744:264 218.06686:260 219.0764:795 219.09518:401 234.06934:539 235.07195:1225 245.20923:133 262.06308:384 262.20926:306 263.07126:4348	5406	5278	9625	27314	12996	42606	305516	150438	4709	6188	41127	12785
2461	7.468	Huperzine A	[M+Na]+	265.131	C15H18N2O	Quinolones and derivatives	ZRJBHWIHUMBLCN-UHFFFAOYSA-N	OC=1N=C2C(=CC1)C3(N)C(=CC)C(C=C(C)C3)C2	81.4	265.10632:24968 266.10967:2048 267.11303:0	265.08698:385	87495	37809	29842	26159	39877	80178	65743	39576	32179	69757	73944	54860
2591	11.155	E-Resveratrol trimethyl ether	[M+H]+	271.133	C17H18O3	Stilbenes	GDHNBPHYVRHYCC-SNAWJCMRSA-N	COC1=CC=C(\C=C\C2=CC(OC)=CC(OC)=C2)C=C1	80.1	271.16391:1983 272.16726:111 273.17062:861	271.13974:126	12408	10662	10872	12987	12419	10361	15012	13894	11500	6288	12618	12806
2629	7.38	Sempervirine	[M+H]+	273.139	C19H16N2	Beta carbolines	UQVUEULZDJRMJR-UHFFFAOYSA-N	C1CCC2=CC3=C4N=C5C=CC=CC5=C4C=CN3C=C2C1	81.4	273.11096:2383 274.11431:410 275.11767:1230	273.15421:126	11079	7628	10102	9525	7517	5916	7076	11714	7880	8540	10873	10535
2633	4.626	Galaxolidone	[M+H]+	273.185	C18H24O2	2-benzopyrans	PGMHPYRIXBRRQD-UHFFFAOYNA-N	CC1C(C)(C)C2=C(C=C3C(=O)OCC(C)C3=C2)C1(C)C	83.3	273.16589:3073 274.16924:686 275.1726:1110	273.15799:252	26482	45989	49549	53479	47167	17885	18398	31285	16250	39927	43307	20585
2707	6.099	Heteropeucenin, Methyl Ether	[M+H]+	275.128	C16H18O4	Chromones	KVNRDSLYCOJCRD-UHFFFAOYSA-N	O=C1C=C(OC=2C1=C(O)C=C(OC)C2CC=C(C)C)C	84.9	275.12534:2809 276.12869:576 277.13205:672	275.11691:252	7194	6779	4925	9836	7560	7568	8991	7197	5919	6146	6822	6998
2750	9.28	Homatropine	[M+H]+	276.159	C16H21NO3	Tropane alkaloids	ZTVIKZXZYLEVOL-UHFFFAOYNA-N	CN1C2CCC1CC(C2)OC(=O)C(O)C1=CC=CC=C1	80.4	276.16171:1625 277.16506:956 278.16842:411	276.16071:126	3425	5197	4843	7054	7342	3839	5032	3957	4821	6397	3913	5101
2863	10.406	Dibutyl phthalate	[M+H]+	279.159	C16H22O4	Benzoic acid esters	DOIRQSBPFJWKBE-UHFFFAOYSA-N	CCCCOC(C1=CC=CC=C1C(=O)OCCCC)=O	80.7	279.15851:287633 280.16186:73919 281.16522:11178	57.07328:391 84.5999:256 121.0751:352 149.0143:10306 154.03487:126 205.08304:126	783578	1347069	952628	910738	1133637	698270	706092	632690	709438	657356	691442	704398
3185	3.623	(4R)-3-methylidene-4-[(E)-3-methyl-4-(4-methyl-5-oxooxolan-2-yl)but-2-enyl]oxolan-2-one	[M+H]+	287.099	C15H20O4	Terpene lactones	KFKSQOIZZRZEFC-BZFAMWISSA-N	O=C1OCC(C1=C)CC=C(C)CC2OC(=O)C(C)C2	80	287.10883:11433 288.11218:2125 289.11554:450	199.16472:126 287.10303:391	402	447	306	387	590	774	43384	32506	32865	28958	36724	39040
3438	3.171	5'-S-Methylthioadenosine	[M+H]+	298.097	C11H15N5O3S	5'-deoxy-5'-thionucleosides	WUUGFSXJNOTRMR-IOSLPCCCSA-N	CSC[C@H]1O[C@H]([C@H](O)[C@@H]1O)N1C=NC2=C(N)N=CN=C12	83.5	298.09558:26455 299.09893:7026 300.10229:2579	119.02682:126 136.04639:266 136.05132:931 145.73944:126	118384	111753	92714	103362	94023	116771	127350	103193	117910	128669	121309	136053
3512	8.536	DErySphingosine	[M+H]+	300.29	C18H37NO2	1,2-aminoalcohols	WWUZIQQURGPMPG-KRWOKUGFSA-N	CCCCCCCCCCCCC\C=C\[C@@H](O)[C@@H](N)CO	81.7	300.28857:6833 301.29192:1769 302.29528:2244	259.1087:126 282.26181:391 300.27982:252	19728	21916	18958	21472	21131	22139	19587	21692	16948	16583	20258	18468
3526	12.486	Tectorigenin	[M+H]+	301.071	C16H12O6	Isoflavones	OBBCRPUNCUPUOS-UHFFFAOYSA-N	COC1=C(O)C2=C(OC=C(C2=O)C2=CC=C(O)C=C2)C=C1O	86	301.07532:4260 302.07867:750 303.08203:187	301.06921:126	15128	17532	17814	15961	12005	8769	12949	3129	10485	11659	7531	8249
3737	1.717	Glutathione	[M+H]+	308.091	C10H17N3O6S		RWSXRVCMGQZWBV-WDSKDSINSA-N	O=C(O)CN=C(O)C(N=C(O)CCC(N)C(=O)O)CS	84.5	308.09177:49243 309.09512:9832 310.09848:4195	76.02116:252 142.04431:256 146.01814:260 162.00883:394 179.03214:385 179.03969:654 187.03688:126 233.04704:256 285.49268:126 308.08777:261	229523	186769	2645	179657	2097	701	930	169604	57146	67123	153605	433
3918	9.835	2-[2-(3,4-dimethoxyphenyl)ethyl]-4-methoxy-2,3-dihydropyran-6-one	[M+Na]+	315.12	C16H20O5	Kavalactones	HEURTYMJWQPWNN-UHFFFAOYSA-N	O=C1OC(CC(OC)=C1)CCC2=CC=C(OC)C(OC)=C2	83.3	315.13547:15385 316.13882:2889 317.14218:3187	315.12387:518	44103	114843	83997	51171	81279	46214	47530	46138	40511	36651	43613	44732
3921	13.422	Clomipramine	[M+H]+	315.162	C19H23ClN2		GDLIGKIOYRNHDA-UHFFFAOYSA-N	ClC1=CC=C2C(=C1)N(C=3C=CC=CC3CC2)CCCN(C)C	80.3	315.16061:25581 316.16396:18431 317.16732:35008	86.0947:660 235.12433:126 270.09747:520 315.15402:660	183	42	139	109	100	36585	198	40	52	154	147	50
3989	9.726	Drofenine	[M+H]+	318.243	C20H31NO2	Benzene and substituted derivatives	AGJBLWCLQCKRJP-UHFFFAOYNA-N	CCN(CC)CCOC(=O)C(C1CCCCC1)C1=CC=CC=C1	80.4	318.24179:23951 319.24514:7338 320.2485:1364	318.23007:788	14580	41031	40368	20730	71431	135735	7429	8052	11457	99723	16813	41848
3998	8.346	Phytosphingosine	[M+H]+	318.299	C18H39NO3	Lipids	AERBNCYCJBRYDG-UHFFFAOYNA-N	OCC(N)C(O)C(O)CCCCCCCCCCCCCC	88.9	318.30212:68684 319.30547:22309 320.30883:2478	60.04982:252 282.27997:260 300.28635:773 318.27783:537 318.29544:831	225417	222520	220240	224240	175520	209198	223448	240833	224543	230571	229803	233615
4029	8.233	Cryptotanshinone	[M+Na]+	319.13	C19H20O3	Tanshinones, isotanshinones, and derivatives	GVKKJJOMQCNPGB-JTQLQIEISA-N	O=C1C(=O)C2=C(OCC2C)C=3C=CC4=C(C13)CCCC4(C)C	83	319.11606:6360 320.11941:1728 321.12277:432	319.09174:256	80967	30292	8654	15770	5461	7503	16896	43396	10581	19094	102399	7557
4122	11.275	(3S)-5-[(1S,8aR)-2,5,5,8a-tetramethyl-4-oxo-4a,6,7,8-tetrahydro-1H-naphthalen-1-yl]-3-methylpentanoic acid	[M+H]+	321.242	C20H32O3		JJGYRVZPUJUFTR-DRWSLCSESA-N	O=C(O)CC(C)CCC1C(=CC(=O)C2C(C)(C)CCCC12C)C	92.5	321.24173:4781 322.24508:2418 323.24844:1023	303.22522:126 303.22769:126 321.21729:126 321.24765:252	10815	19744	14360	11984	24109	12619	11048	10522	8378	9251	11506	12435
4186	8.213	1-[4,5-bis(hydroxymethyl)-3-methoxy-2-methylphenoxy]-3-methylbutane-2,3-diol	[M+Na]+	323.146	C15H24O6	Benzyl alcohols	MAQMWSUGBCIGLJ-UHFFFAOYSA-N	OCC1=CC(OCC(O)C(O)(C)C)=C(C(OC)=C1CO)C	84.9	323.14767:1937 324.15102:204 325.15438:264	323.12314:126 323.12823:126 323.13077:126 323.13583:126	17179	27086	11290	6132	10749	3155	3818	11110	2940	6852	31454	2986
4233	11.36	Quinidine	[M+H]+	325.191	C20H24N2O2	Cinchona alkaloids	LOUPRKONTZGTKE-VPCNSNALSA-N	COC1=CC2=C(C=CN=C2C=C1)[C@@H](O)[C@@H]1C[C@H]2CCN1C[C@H]2C=C	84.9	325.17731:5968 326.18066:2370 327.18402:2370	325.19083:126	26651	22390	24201	22352	18020	19964	19239	20599	21919	19277	16399	16317
4278	9.39	HERALENOL	[M+Na]+	327.084	C16H16O6	Psoralens	FOINLJRVEBYARJ-UHFFFAOYSA-N	O=C1OC=2C(C=C1)=CC=3C=COC3C2OCC(O)C(O)(C)C	84.5	327.0777:4446 328.08105:392 329.08441:0	327.08105:252	14660	15942	13362	9999	14882	11492	12730	13076	13352	12658	13281	13757
4470	5.536	Berberine	[M]+	336.123	C20H18NO4	Protoberberine alkaloids and derivatives	YBHILYKTIRIUTE-UHFFFAOYSA-N	COC1=C(OC)C2=C[N+]3=C(C=C2C=C1)C1=CC2=C(OCO2)C=C1CC3	81.7	336.11768:3418 337.12103:969 338.12439:0	321.09109:128 336.09991:191 336.11285:257	2560	3848	3618	3714	3315	1707	718	2736	2465	1483	2447	3630
4683	12.492	5-(1,2,4a,5-tetramethyl-7-oxo-3,4,8,8a-tetrahydro-2H-naphthalen-1-yl)-3-methylpentanoic acid	[M+Na]+	343.224	C20H32O3	Colensane and clerodane diterpenoids	RNWHJFUXZQBBLK-UHFFFAOYSA-N	O=C(O)CC(C)CCC1(C)C(C)CCC2(C(=CC(=O)CC21)C)C	84.4	343.22556:2190 344.22891:872 345.23227:436	343.21848:252	8472	22583	9565	5887	5893	2056	3464	3632	1343	1005	2456	3672
4685	7.282	CocamidopropylBetaine	[M+H]+	343.296	C19H38N2O3	Alpha amino acids	MRUAUOIMASANKQ-UHFFFAOYSA-N	CCCCCCCCCCCC(=O)NCCC[N+](C)(C)CC([O-])=O	84.1	343.29245:7498 344.2958:2252 345.29916:381	119.0267:260 240.22662:923 241.23355:135	13680	23193	18971	20399	28522	30177	26512	20079	31889	31642	32785	24030
4766	2.926	AMP	[M+H]+	348.07	C10H14N5O7P	Purine ribonucleoside monophosphates	UDMBCSSLTHHNCD-KQYNXXCUSA-N	NC1=C2N=CN([C@@H]3O[C@H](COP(O)(O)=O)[C@@H](O)[C@H]3O)C2=NC=N1	83.4	348.09189:11517 349.09524:2166 350.0986:300	348.07407:266	55614	28251	74016	41455	33769	18388	81220	56426	41942	29243	70503	18600
4789	3.476	(E)-4-[(1R,2S,3S,4R,8aS)-2,3,4-trihydroxy-2,5,5,8a-tetramethyl-3,4,4a,6,7,8-hexahydro-1H-naphthalen-1-yl]but-3-en-2-one	[M+K]+	349.178	C18H30O4	Sesquiterpenoids	GUVJPXABQYFWPD-GSZDNMEJSA-N	O=C(C=CC1C(O)(C)C(O)C(O)C2C(C)(C)CCCC12C)C	85.1	349.18192:4257 350.18527:779 351.18863:169	349.17197:385	1857	3287	2469	3742	3233	4634	3493	2747	3113	3018	18031	2644
4883	4.841	Anileridine	[M+H]+	353.222	C22H28N2O2	Phenylpiperidines	LKYQLAWMNBFNJT-UHFFFAOYSA-N	CCOC(=O)C1(CCN(CCC2=CC=C(N)C=C2)CC1)C1=CC=CC=C1	82.8	353.23712:2376 354.24047:958 355.24383:82	353.21912:378	6751	5863	5639	3721	5331	8077	5932	6979	9553	6933	14466	4440
5385	3.668	(-)-Riboflavin	[M+H]+	377.146	C17H20N4O6	Flavins	AUNGANRZJHBGPY-SCRDCRAPSA-N	O=C1N=C(O)C2=NC3=CC(=C(C=C3N(C2=N1)CC(O)C(O)C(O)CO)C)C	90	377.14227:1457 378.14562:515 379.14898:133	243.07744:256 377.12344:382 377.13715:382	6116	6088	6023	8674	6945	6510	4541	5363	4715	5942	6453	6888
5510	5.671	(E)-8-(4-hydroxy-6-methoxy-7-methyl-3-oxo-1H-2-benzofuran-5-yl)-2,6-dimethyloct-6-enoic acid	[M+Na]+	385.161	C20H26O6		QPRODDKTRBCFPV-DHZHZOJOSA-N	O=C1OCC2=C1C(O)=C(C(OC)=C2C)CC=C(C)CCCC(C(=O)O)C	82.4	385.14578:1841 386.14913:669 387.15249:150	385.14301:126	2402	4680	2431	1289	2320	1444	8136	6681	7694	7210	8487	11647
5622	14.684	Di(2-ethylhexyl)phthalate (DEHP)	[M+H]+	391.284	C24H38O4	Benzoic acid esters	BJQHLKABXJIVAM-UHFFFAOYNA-N	CCCCC(CC)COC(C1=CC=CC=C1C(=O)OCC(CC)CCCC)=O	88.8	391.28592:423173 392.28927:129863 393.29263:21051	57.069:384 65.03603:126 71.08224:263 113.13717:410 121.02856:257 149.01436:9638 149.9579:252 153.7234:283 164.9447:268 167.02774:1921 173.15285:290 279.14337:533	2059050	2651774	2155350	1686800	1551696	1615054	1653618	1345825	1638653	1426229	1168877	1659229
5875	7.385	methyl 2-(4,5-dihydroxy-6-methoxy-3,6-dimethyl-2-oxocyclohex-3-en-1-yl)oxy-4-hydroxy-3,6-dimethylbenzoate	[M+Na]+	403.136	C19H24O8		GJGRGJCMJUMZKN-UHFFFAOYSA-N	O=C(OC)C1=C(OC2C(=O)C(=C(O)C(O)C2(OC)C)C)C(=C(O)C=C1C)C	82	403.14255:1902 404.1459:972 405.14926:972	362.8858:32 403.13425:189	165	6822	2908	485	6385	537	175	317	270	724	462	304
6052	12.661	2-acetoxy-4-pentadecylbenzoic acid	[M+Na]+	413.266	C24H38O4	Acylsalicylic acids	FMPIFABORGZGFA-UHFFFAOYSA-N	O=C(O)C1=CC=C(C=C1OC(=O)C)CCCCCCCCCCCCCCC	82.7	413.26181:6030 414.26516:2846 415.26852:0	301.14966:129 340.40091:128 413.259:445	26919	23369	27256	23700	10228	10606	17545	13855	7758	14402	12966	14704
6544	12.386	Leupeptin	[M+H]+	427.303	C20H38N6O4	Dipeptides	GDBQQVLCIARPGH-IKGGRYGDSA-N	CC(C)C[C@H](N=C(C)O)C(O)=N[C@@H](CC(C)C)C(O)=N[C@H](CCCNC(N)=N)C=O	85.7	427.302:7275 428.30535:2501 429.30871:1073	427.29309:818	49614	58434	53715	49000	40510	42974	27221	26736	30168	30526	33680	17565
7877	5.264	9-methoxy-7-[4-[(2S,3R,4S,5S,6R)-3,4,5-trihydroxy-6-(hydroxymethyl)oxan-2-yl]oxyphenyl]-[1,3]dioxolo[4,5-g]chromen-8-one	[M+H]+	475.123	C23H22O11		MLRDPISQDDYRHC-BSTKLLGTSA-N	O=C1C(=COC=2C=C3OCOC3=C(OC)C12)C=4C=CC(OC5OC(CO)C(O)C(O)C5O)=CC4	80.8	475.15347:1553 476.15682:176 477.16018:88	475.16281:126	72	25	87	106	55	130	4439	5405	4421	5653	4489	5581
8517	6.907	(2S)-2-[(2R,3S,7R,8R,8aS)-2,3,4'-trihydroxy-4,4,7,8a-tetramethyl-6'-oxospiro[2,3,4a,5,6,7-hexahydro-1H-naphthalene-8,2'-3,8-dihydrofuro[2,3-e]isoindole]-7'-yl]-3-methylbutanoic acid	[M+H]+	502.277	C28H39NO7		JJWKFIISZGZPHY-PTNCSMPOSA-N	O=C(O)C(N1C(=O)C2=CC(O)=C3C(OC4(C3)C(C)CCC5C(C)(C)C(O)C(O)CC54C)=C2C1)C(C)C	83.9	502.27661:2622 503.27996:996 504.28332:310	484.25018:63 502.24744:257	3992	3417	2684	5258	11448	6470	7113	9400	5493	3132	3420	6567
9295	3.872	Puberanidine	[M+H]+	543.306	C30H42N2O7	Lappaconitine-type diterpenoid alkaloids	VSUODASNSRJNCP-WGVBKJPXSA-N	CCN1C[C@@]2(CC[C@H](OC)C34[C@@H]5C[C@H]6[C@H](OC)[C@]5(O)[C@](O)(C[C@@H]6OC)C(C[C@H]23)C14)OC(=O)C1=CC=CC=C1N	80.1	543.30621:1513 544.30956:199 545.31292:400	543.27887:252	8132	4873	2864	7742	6379	14203	8942	6771	12442	13131	11811	19913
9600	12.546	Protoporphyrin IX	[M+H]+	563.264	C34H34N4O4		ZCFFYALKHPIRKJ-UJJXFSCMSA-N	O=C(O)CCC=1C2=NC(=CC=3NC(C=C4NC(=CC5=NC(=C2)C(=C5C)CCC(=O)O)C(=C4C=C)C)=C(C3C=C)C)C1C	83.5	563.26239:11526 564.26574:4921 565.2691:1257	322.12671:126 445.26022:268 490.22925:261 563.2373:1956 563.25739:1562	42688	52898	68070	80144	44416	50834	62049	107216	44025	94098	41485	55830
77	1.325	D-(+)-Malic acid	[M-H]-	133.014	C4H6O5	Beta hydroxy acids and derivatives	BJEPYKJPYRNKOW-UWTATZPHSA-N	O[C@H](CC(O)=O)C(O)=O	87.1	133.0135:28533 134.01685:1339 135.02021:2065	59.0187:259 71.01431:654 72.99335:523 78.96198:395 89.03103:133 115.00215:670 133.01549:252	73001	57940	94386	12953	67869	56304	48876	150644	43474	248856	177463	76041.8
174	1.35	Glycerophosphate(2)	[M-H]-	171.006	C3H9O6P	Glycerophosphates	AWUCVROLDVIAJX-GSVOUGTGSA-N	OC[C@@H](O)COP(O)(O)=O	83.3	171.00638:6952 172.00973:308 173.01309:15	78.95997:812	59526	82180	40422	11884	136548	60397	204642	185191	135381	295505	261562	109171
516	1.322	4'-Hydroxyflavone	[M-H]-	237.056	C15H10O3	Monohydroxyflavonoids	SHGLJXBLXNNCTE-UHFFFAOYSA-N	OC1=CC=C(C=C1)C1=CC(=O)C2=CC=CC=C2O1	82.2	237.06067:7832 238.06402:892 239.06738:76	117.02919:126 117.0353:126 117.03988:126 237.05901:126	98983	47096	61103	7066	69776	24590	29949	47222	26375	84151	30562	39344
560	12.981	Pentadecanoic acid	[M-H]-	241.217	C15H30O2	Long-chain fatty acids	WQEPLUUGTLDZJY-UHFFFAOYSA-N	CCCCCCCCCCCCCCC(O)=O	86	241.21725:15853 242.2206:2245 243.22396:272	241.20967:654	52127	62743	53298	40224	43301	38163	42822	42250	31493	39064	39719	48517.8
642	12.475	9-Trans-Palmitelaidic acid	[M-H]-	253.217	C16H30O2	Long-chain fatty acids	SECPZKHBENQXJG-BQYQJAHWSA-N	CCCCCC\C=C\CCCCCCCC(O)=O	85.8	253.21851:564983 254.22186:182540 255.22522:30428	253.2146:3772	3289860	2722299	2797391	3105411	2859553	2991447	3035008	3280532	2582895	2879992	3199052	2.73278e+06
664	13.623	Palmitic acid (NMR)	[M-H]-	255.233	C16H32O2	Long-chain fatty acids	IPCSVZSSVZVIGE-UHFFFAOYSA-N	CCCCCCCCCCCCCCCC(O)=O	87.4	255.23247:287049 256.23582:58339 257.23918:5484	237.23798:253 255.22864:6670	1194768	2056342	1415663	1427563	1477779	818829	887175	1382130	1032193	1275677	1186788	1.26936e+06
694	1.351	Mannose 1-phosphate	[M-H]-	259.022	C6H13O9P	Monosaccharide phosphates	HXXFSFRBOHSIMQ-RWOPYEJCSA-N	OC[C@H]1O[C@H](OP(O)(O)=O)[C@@H](O)[C@@H](O)[C@@H]1O	91.3	259.0206:8727 260.02395:617 261.02731:517	78.95998:387 96.97353:263	101997	90128	30052	16547	117006	67541	74907	26995	69238	45736	19564	48016.4
886	12.594	Oleic acid	[M-H]-	281.249	C18H34O2	Long-chain fatty acids	ZQPPMHVWECSIRJ-KTKRTIGZSA-N	CCCCCCCC\C=C/CCCCCCCC(O)=O	85.3	281.24588:7079 282.24923:1208 283.25259:20578	281.25095:382	28365	15785	24650	18388	19184	20397	16157	22588	24180	19619	11207	20826.2
887	13.667	Trans-Vaccenic acid	[M-H]-	281.249	C18H34O2	Long-chain fatty acids	UWHZIFQPPBDJPM-BQYQJAHWSA-N	CCCCCC\C=C\CCCCCCCCCC(O)=O	86	281.24863:194459 282.25198:45173 283.25534:41070	170.66844:126 263.22543:324 281.24658:4788	956498	869518	827448	842723	824449	813837	804487	969182	702728	847443	928991	816130
904	11.156	Phenylethyl 2-Glucoside	[M-H]-	283.119	C14H20O6	O-glycosyl compounds	MLRIJUWUQTVDQE-RKQHYHRCSA-N	OCC1OC(OCCC=2C=CC=CC2)C(O)C(O)C1O	81.7	283.14041:1071 284.14376:0 285.14712:673	283.259:378	3119	3013	2877	2982	2449	2562	3275	3357	2492	2902	3832	2725.03
909	8.299	Stearic acid	[M-H]-	283.264	C18H36O2	Long-chain fatty acids	QIQXTHQIDYTFRH-UHFFFAOYSA-N	CCCCCCCCCCCCCCCCCC(O)=O	85.1	283.26279:7545 284.26614:660 285.2695:0	283.2944:126	17008	9055	24557	10534	20631	22038	6606	14426	11884	21344	14654	13838.7
993	12.177	FA 18:2+O	[M-H]-	293.212	C18H30O3	Oxidized fatty acids	HKSDVVJONLXYKL-UHFFFAOYNA-N	O=C(O)CCCCCCCC=CCC=CCC1OC1(CC)	86.2	293.21103:1371 294.21438:0 295.21774:1080	293.17255:126 293.17737:126 293.18704:126 293.20877:126	2757	7330	5554	4164	4560	2126	2170	1746	2844	2940	1277	3017.9
1046	12.138	FA 18:1+1O	[M-H]-	297.244	C18H34O3	Oxidized fatty acids	IMYZYCNQZDBZBQ-UHFFFAOYNA-N	O=C(O)CCCCCCCC1OC1(CCCCCCCC)	91.4	297.24268:9999 298.24603:2244 299.24939:1103	279.24048:126 297.23303:513	32726	60661	46933	26588	40997	13026	33281	28656	29028	34070	36408	33880.5
1047	11.444	Lichesterylic acid	[M-H]-	297.241	C18H34O3		FYKXUGIGKHKTDH-UHFFFAOYSA-N	O=C(CCCCCCCCCCCCC)CC(C(=O)O)C	81.4	297.24283:6849 298.24618:2015 299.24954:260	253.24879:126 297.24777:644	24147	42613	26169	26146	30029	26782	25479	26285	26133	24429	27953	25427
1074	10.947	dehydroabietic acid	[M-H]-	299.202	C20H28O2	Diterpenoids	NFWKVWVWBFBAOV-IPNZSQQUSA-N	O=C(O)C1(C)CCCC2(C3=CC=C(C=C3CCC12)C(C)C)C	84.3	299.19958:2980 300.20293:451 301.20629:401	299.20206:382	3038	11098	5814	2731	8002	2867	2234	2136	8743	3640	2641	4270.4
1103	10.583	Enterodiol	[M-H]-	301.145	C18H22O4	Dibenzylbutanediol lignans	DWONJCNDULPHLV-UHFFFAOYNA-N	OCC(CC1=CC(O)=CC=C1)C(CO)CC1=CC(O)=CC=C1	82.8	301.16742:4044 302.17077:1089 303.17413:622	301.16006:378	17022	16980	21980	11960	15834	21468	17936	15525	23964	18997	21245	15463.7
1251	10.888	9,10-DiHOME	[M-H]-	313.238	C18H34O4	Long-chain fatty acids	XEBKSQSGNGRGDW-JXMROGBWNA-N	CCCCC\C=C\CC(O)C(O)CCCCCCCC(O)=O	80.3	313.24277:1542 314.24612:0 315.24948:0	313.16003:129	1589	10242	5806	1141	5821	540	1081	808	732	655	1362	2715.35
1262	9.081	(1S,4aS,5R)-5-[2-(furan-3-yl)ethyl]-1,4a-dimethyl-6-methylidene-3,4,5,7,8,8a-hexahydro-2H-naphthalene-1-carboxylic acid	[M-H]-	315.197	C20H28O3	Colensane and clerodane diterpenoids	ZQHJXKYYELWEOK-RNHVSHAASA-N	O=C(O)C1(C)CCCC2(C)C(C(=C)CCC12)CCC3=COC=C3	84.4	315.19626:2574 316.19961:172 317.20297:86	315.17841:129	507	7355	1848	643	1105	613	350	334	2956	1854	464	1277.76
1263	9.061	5-{8(Z),11(Z)-pentadecadienyl}resorcinol	[M-H]-	315.233	C21H32O2	Resorcinols	UFMJCOLGRWKUKO-UTOQUPLUSA-N	OC=1C=C(O)C=C(C1)CCCCCCCC=CCC=CCCC	81.5	315.25354:1134 316.25689:137 317.26025:68	315.25592:252	5001	5466	6172	6171	4592	3762	3353	3191	3841	4027	3618	4259.99
1292	13.655	(1R,4aR,5S)-5-(3-hydroxy-3-methylpent-4-enyl)-1,4a-dimethyl-6-methylidene-3,4,5,7,8,8a-hexahydro-2H-naphthalene-1-carboxylic acid	[M-H]-	319.228	C20H32O3	Diterpenoids	LMODNMXJBXUOQF-NFSBWDCGSA-N	O=C(O)C1(C)CCCC2(C)C(C(=C)CCC12)CCC(O)(C=C)C	84.2	319.22272:1489 320.22607:285 321.22943:342	319.24768:126	7435	6436	6244	5853	5440	5914	5865	6511	4532	5783	6682	5704.54
1388	1.73	Adenosine 3':5'-cyclicmonophosphate	[M-H]-	328.045	C10H12N5O6P	3',5'-cyclic purine nucleotides	IVOMOUWHDPKRLL-KQYNXXCUSA-N	NC1=C2N=CN([C@@H]3O[C@@H]4COP(O)(=O)O[C@H]4[C@H]3O)C2=NC=N1	81.1	328.0593:6383 329.06265:1206 330.06601:734	128.03282:126 328.04614:378	198	31297	47083	613	33689	20925	21330	10150	9787	24251	3976	17648.2
1502	11.871	8-Prenylnaringenin	[M-H]-	339.124	C20H20O5	8-prenylated flavanones	LPEPZZAVFJPLNZ-SFHVURJKSA-N	CC(C)=CCC1=C(O)C=C(O)C2=C1O[C@@H](CC2=O)C1=CC=C(O)C=C1	85.7	339.12286:3518 340.12621:1344 341.12957:252	339.13007:378	10334	9109	8743	9401	4252	3948	4386	5180	4193	5253	4199	6139.43
1742	13.099	Dehydroisoandrosterone sulfate	[M-H]-	367.158	C19H28O5S	Sulfated steroids	CZWCKYRVOZZJNM-UHFFFAOYNA-N	O=C1CCC2C3CC=C4CC(OS(=O)(=O)O)CCC4(C)C3CCC12C	82.5	367.15762:1513 368.16097:836 369.16433:420	99.93404:126 367.16205:378	4787	3380	3487	3754	2980	3745	3385	3243	1878	2475	2934	3287.01
1993	13.618	aloesin	[M-H]-	393.119	C19H22O9		HKIKAXXIWJHWLY-UHFFFAOYSA-N	O=C1C=C(OC2=C1C(=CC(O)=C2C3OC(CO)C(O)C(O)C3O)C)CC(=O)C	82.5	393.10471:1155 394.10806:546 395.11142:728	393.09201:126 393.09479:126 393.11157:126 393.12277:126	3362	2972	1478	3386	5305	4225	4188	2917	2699	2945	2567	3201.93
2098	1.898	Cytidine-5'-diphosphate	[M-H]-	402.011	C9H15N3O11P2	Pyrimidine ribonucleoside diphosphates	ZWIADYZPOWUWEW-XVFCMESISA-N	O[C@H]1[C@@H](O)[C@@H](O[C@@H]1COP(O)(=O)OP(O)(O)=O)N1C=CC(=N)N=C1O	82	402.03094:1239 403.03429:1494 404.03765:378	402.04349:126	1222	10446	1270	5152	14093	23359	10535	25450	13469	11327	27811	11451.7
2326	3.813	(3R,7R,8R,8aS)-3,4'-dihydroxy-7'-(2-hydroxyethyl)-4,4,7,8a-tetramethylspiro[2,3,4a,5,6,7-hexahydro-1H-naphthalene-8,2'-3,8-dihydrofuro[2,3-e]isoindole]-6'-one	[M-H]-	428.244	C25H35NO5		ZHECNBLIOXZXBL-TVDJWTRXSA-N	O=C1C2=CC(O)=C3C(OC4(C3)C(C)CCC5C(C)(C)C(O)CCC54C)=C2CN1CCO	85.7	428.25006:1441 429.25341:418 430.25677:0	428.25977:84	4256	3443	1638	3313	2746	8857	5601	12320	4169	3162	9736	5217.14
2380	9.019	Irisxanthone	[M-H]-	435.094	C20H20O11		MTQVPZUZBBTLNO-HSLVGEKZSA-N	O=C1C2=CC=C(O)C(OC)=C2OC3=CC(O)=C(C(O)=C13)C4OC(CO)C(O)C(O)C4O	86.2	435.09949:2048 436.10284:557 437.1062:362	435.10031:257	292	1007	311	1019	5070	15441	2247	367	1810	9483	6193	3327
2461	5.111	Baicalin	[M-H]-	445.078	C21H18O11	Flavonoid-7-O-glucuronides	IKIIZLYTISPENI-UHFFFAOYNA-N	OC1C(O)C(OC2=C(O)C(O)=C3C(=O)C=C(OC3=C2)C2=CC=CC=C2)OC(C1O)C(O)=O	82.7	445.07803:1281 446.08138:422 447.08474:60	102.95673:13 175.01971:25 240.92479:38 257.5419:13 269.04352:101 308.86771:25 445.10852:25	22	25	23	4754	56	70	29	94	85	41	131	349.127
2748	1.726	Isoquercitrin	[M-H]-	463.088	C21H20O12	Flavonoid-3-O-glycosides	OVSQVDMCBVZWGM-QSOFNFLRSA-N	OC[C@H]1O[C@@H](OC2=C(OC3=CC(O)=CC(O)=C3C2=O)C2=CC(O)=C(O)C=C2)[C@H](O)[C@@H](O)[C@@H]1O	80.4	463.08774:3392 464.09109:867 465.09445:48	463.05478:254	150	8846	11551	4946	10727	7403	7931	9555	8148	11278	7074	7351.32
3486	9.694	LPC 16:0	[M+FA-H]-	540.331	C24H50NO7P	Lipids	ASWBNKHCZGQVJV-UHFFFAOYNA-N	O=C(OCC(O)COP(=O)([O-])OCC[N+](C)(C)C)CCCCCCCCCCCCCCC	88	540.3255:4565 541.32885:2466 542.33221:170	255.23563:382 480.3219:521 540.32446:133	1719	1420	1514	23152	15454	1238	2124	557	674	837	970	5830.65
4779	6.377	Ginsenoside Rh1	[M+FA-H]-	683.438	C36H62O9	Triterpenoids	RAQNTCRNSXYLAH-UHFFFAOYNA-N	CC(C)=CCCC(C)(O)C1CCC2(C)C1C(O)CC1C3(C)CCC(O)C(C)(C)C3C(CC21C)OC1OC(CO)C(O)C(O)C1O	86.1	683.43811:1096 684.44146:693 685.44482:142	683.44623:168	408	912	475	327	4318	11271	2828	103	394	2892	3151	2177.58
5430	15.132	3-[6-[[(2R,3R,4R,5S,6S)-3,5-dihydroxy-6-methyl-4-[(2S,3R,4R,5R,6S)-3,4,5-trihydroxy-6-methyloxan-2-yl]oxyoxan-2-yl]oxymethyl]-3,4,5-trihydroxyoxan-2-yl]oxy-5-hydroxy-2-(4-hydroxyphenyl)-7-methoxychromen-4-one	[M-H]-	753.225	C34H42O19		MQMTVWHXCSRCER-OHWKTECQSA-N	O=C1C(OC2OC(COC3OC(C)C(O)C(OC4OC(C)C(O)C(O)C4O)C3O)C(O)C(O)C2O)=C(OC5=CC(OC)=CC(O)=C15)C=6C=CC(O)=CC6	82	753.23114:18624 754.23449:21550 755.23785:7595	351.04883:126 589.22266:126 681.59192:126 690.53552:126 735.20935:126 752.17401:367 753.18048:610 753.21533:3885	13835	6518	8764	19774	31578	36123	29064	28829	19871	30270	47217	20092.1
5741	15.113	Ginsenoside Rf	[M-H]-	799.485	C42H72O14	Triterpenoids	UZIOUZHBUYLDHW-UHFFFAOYNA-N	CC(C)=CCCC(C)(O)C1CCC2(C)C1C(O)CC1C3(C)CCC(O)C(C)(C)C3C(CC21C)OC1OC(CO)C(O)C(O)C1OC1OC(CO)C(O)C(O)C1O	80.4	799.48572:11816 800.48907:7555 801.49243:30340	799.52954:261	21867	27797	26037	25446	26598	27580	21795	26460	25451	31422	29172	20720.8
5902	6.228	Ginsenoside Rg3(S-FORM)	[M+FA-H]-	829.495	C42H72O13	Triterpene saponins	RWXIFXNRCLMQCD-UHFFFAOYNA-N	CC(C)=CCCC(C)(O)C1CCC2(C)C1C(O)CC1C3(C)CCC(OC4OC(CO)C(O)C(O)C4OC4OC(CO)C(O)C(O)C4O)C(C)(C)C3CCC21C	83.3	829.49371:1272 830.49706:509 831.50042:291	782.56116:26 783.50085:306 784.50037:38 829.42725:38 829.49634:88 829.53693:38	303	271	131	305	1078	3361	759	15	33	803	716	677.42
